# Supplementary material
Source: PubMed Central journal article supplement (PMC7095078)
Supplement: 41586_2004_BFnature03063_MOESM4_ESM.pdf [file 41586_2004_BFnature03063_MOESM4_ESM.pdf]

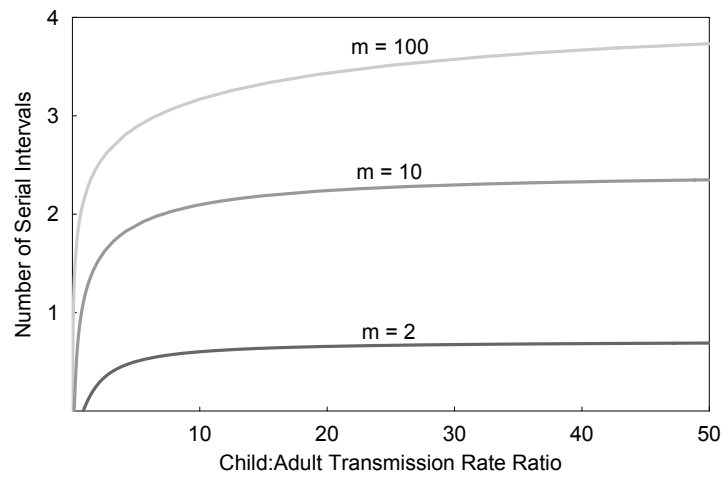

Supplementary Figure 3: Graph of the relationship between the child:adult transmission rate ratio, the adult:child CFP ratio ( $m$ ) and the number of serial intervals required for the exponential growth rate to reflect the magnitude of  $R$ .
